# Supplementary material for: Nuevos dispositivos basados en SIC para diseños en el automóvil y la industria
Source: Royal Society of Chemistry journal article supplement (doi:10.1039/d3dt01510f), 2010-01-01
Supplement: d3dt01510f1.pdf [file d3dt01510f1.pdf]

Supporting data:

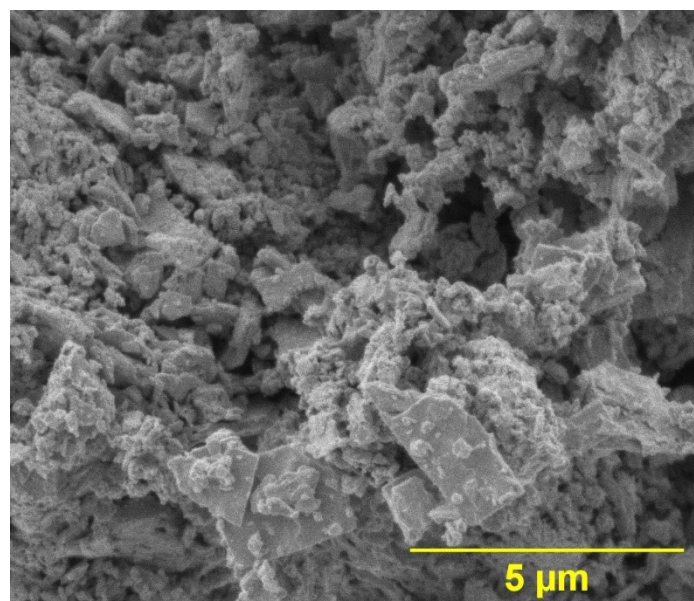

Figure S1 : Micrograph of a mixed oxide obtained through thermal treatment of a mixed oxalate. The platelet shape is inherited from the oxalate precursor (1000°C, 4h, Ar/H<sub>2</sub>-4% atmosphere).

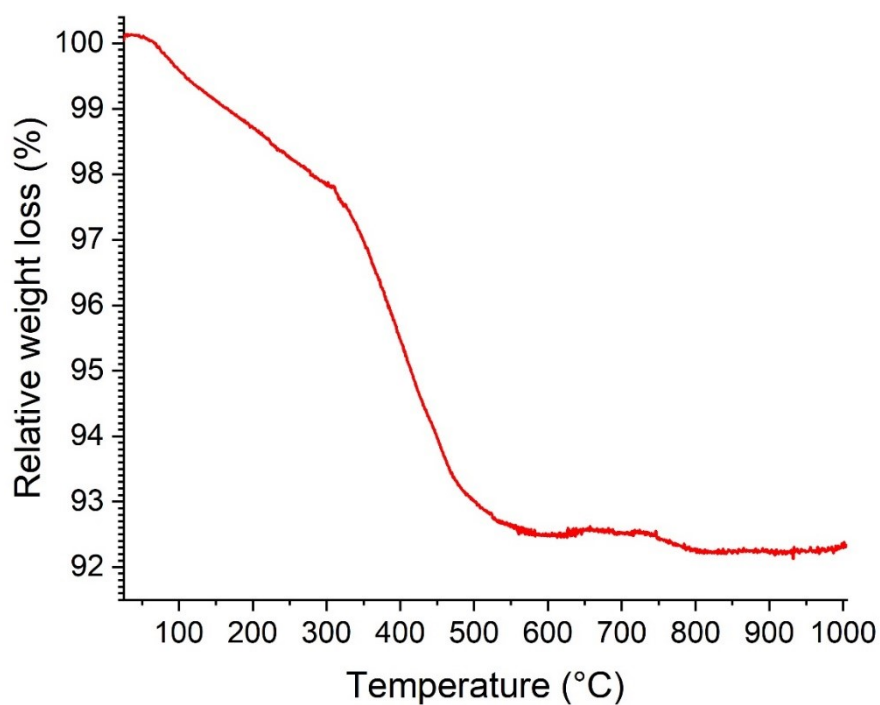

Figure S2 : Thermogravimetric analysis of the oxide sample formed through hydrothermal conversion of a mixed uranium-cerium oxalate (T = 250°C, pH = 8, t = 24 h).

Table S 1: O/M ratios calculated with Sali's equation<sup>43</sup>, as a function of initial pH.

| pH  | Calculated lattice parameter (Å)<br>(from Figure 2 refinements) | Ce/(U+Ce) molar ratio<br>(from Table 1) | O/M ratio |
|-----|-----------------------------------------------------------------|-----------------------------------------|-----------|
| 2   | 5.4339 ± 0.0002                                                 | 0.23 ± 0.02                             | 2.34      |
| 4   | 5.4355 ± 0.0002                                                 | 0.23 ± 0.02                             | 2.31      |
| 5.5 | 5.4355 ± 0.0003                                                 | 0.22 ± 0.02                             | 2.32      |
| 8   | 5.4355 ± 0.0003                                                 | 0.19 ± 0.02                             | 2.36      |
| 10  | 5.4341 ± 0.0002                                                 | 0.21 ± 0.02                             | 2.36      |

Table S 2 : O/M ratios calculated with Sali's equation<sup>43</sup>, as a function of hydrothermal treatment time.

| Hydrothermal treatment time (h) | Calculated lattice parameter (Å)<br>(from Figure 7 refinements) | Ce/(U+Ce) molar ratio<br>(from Table 3) | O/M ratio |
|---------------------------------|-----------------------------------------------------------------|-----------------------------------------|-----------|
| 1                               | 5.4349 ± 0.0006                                                 | 0.21 ± 0.02                             | 2.35      |
| 2                               | 5.4261 ± 0.0007                                                 | 0.19 ± 0.02                             | 2.52      |
| 3                               | 5.4280 ± 0.0006                                                 | 0.24 ± 0.02                             | 2.43      |
| 5                               | 5.4244 ± 0.0001                                                 | 0.19 ± 0.02                             | 2.54      |
| 7                               | 5.4309 ± 0.0005                                                 | 0.20 ± 0.02                             | 2.42      |
| 24                              | 5.4355 ± 0.0003                                                 | 0.19 ± 0.02                             | 2.36      |
| 48                              | 5.4367 ± 0.0003                                                 | 0.21 ± 0.02                             | 2.32      |

Table S 3: O/M ratios calculated with Sali's equation<sup>43</sup>, as a function of xCe.

| Ce/(U+Ce) molar ratio<br>(from Table 5) | Calculated lattice parameter (Å)<br>(from Figure 11 refinements) | O/M ratio |
|-----------------------------------------|------------------------------------------------------------------|-----------|
| 0.10 ± 0.02                             | 5.4419 ± 0.0003                                                  | 2.36      |
| 0.19 ± 0.02                             | 5.4355 ± 0.0003                                                  | 2.36      |
| 0.35 ± 0.02                             | 5.4254 ± 0.0003                                                  | 2.34      |
| 0.48 ± 0.02                             | 5.4184 ± 0.0002                                                  | 2.31      |
| 0.57 ± 0.02                             | 5.4194 ± 0.0002                                                  | 2.18      |
| 0.72 ± 0.02                             | 5.4171 ± 0.0002                                                  | 2.05      |
